# Supplementary material for: The moderating effects of perceptual salience and language aptitude on the effectiveness of L2 recasts
Source: publisher site journal article supplement (doi:10.1515/applirev-2018-0103), 2019-06-20

**Appendix A. Wordlist**

| **English** | **Korean Pronunciation** |  | **English** | **Korean Pronunciation** |
| --- | --- | --- | --- | --- |
| to buy | sa-yo |  | hamburger | hem-buh-guh |
| to eat | muh-guh-yo |  | hippo | ha-ma |
| to explode | tuh-juh-yo |  | horse | mal |
| to fly | na-ɾa-yo |  | hot chocolate | hot-cho-ko |
| to kiss | kee-su-hae-yo |  | ice cream | a-ee-sku-ɾeem |
| to massage | ma-sa-jee-hae-yo |  | jam | jjam |
| to paint | ku-ɾyuh-yo |  | kangaroo | kang-guh-ɾoo |
| to push | mee-ɾuh-yo |  | ketchup | keh-chup |
| to run | ddwee-uh-yo |  | kimchi | kim-chee |
| to shop | sho-ping-hae-yo |  | koala | ko-al-la |
| to sleep | ja-yo |  | lemon | le-mon |
| to wink | weeng-ku-hae-yo |  | lipstick | lip-stik |
|  |  |  | necktie | nek-ta-ee |
|  |  |  | orange | o-ɾen-jee |
|  |  |  | pancake | pen-ke-eek |
| banana | bba-na-na |  | panda | pan-da |
| beagle | bee-gul |  | pelican | pel-lee-kan |
| beaver | bee-buh |  | pen | pen |
| bikini | bee-kee-nee |  | penguin | peng-gween |
| blueberry | bul-loo-beh-ɾee |  | piano | pee-a-no |
| body lotion | ba-dee-ɾo-shun |  | pineapple | pa-ee-ne-pul |
| bread | bbang |  | pizza | pee-ja |
| butter | buh-tuh |  | poodle | poo-dul |
| butterfly | na-bee |  | popcorn | pop-kon |
| cake | ke-eek |  | rice | bob |
| camera | ka-meh-ɾa |  | sandal(s) | sen-dal |
| caramel | ka-ɾa-mel |  | sandwich | sen-du-wee-chee |
| cardigan | ka-dee-gun |  | scarf | ska-pu |
| cell phone | hen-du-pon |  | shampoo | sham-poo |
| cello | chel-lo |  | sheep | yaang |
| cereal | see-ɾee-ull |  | slipper(s) | sul-lee-puh |
| cheetah | chee-ta |  | sofa | so-pa |
| coffee | kuh-pee |  | spaghetti | spa-ge-tee |
| coke | kol-la |  | stocking(s) | sta-king |
| cookie | koo-kee |  | television | tee-bee |
| curtains | kuh-ten |  | tofu | doo-boo |
| cushion | koo-shun |  | tomato | to-ma-to |
| dalmatian | dal-ma-shee-an |  | treadmill | ɾun-ning-muh-sheen |
| fried chicken | chee-keen |  | unicorn | yoo-nee-kon |
| gorilla | ko-ɾil-la |  | violin | ba-ee-ol-leen |
| guitar | kee-ta |  | waffle | wa-pul |
| gum | ggum |  |  |  |

**Appendix B. Example of treatment tasks**

1. Subject –*i/ka* (Task 1)

<Student> “A dog runs”


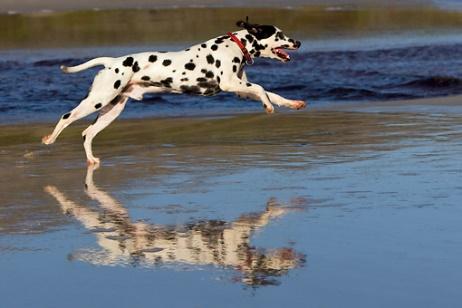


<Researcher> (Chooses between the two pictures)


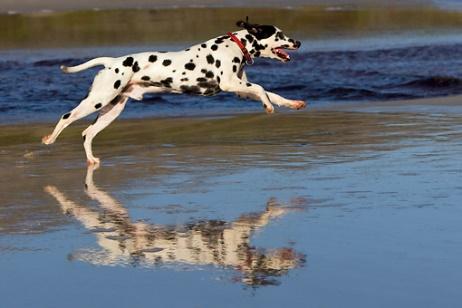

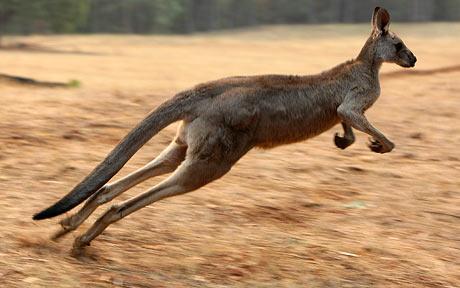


2. Object –*ul/lul* (Task 2)

<Student> “(Someone) eats rice”


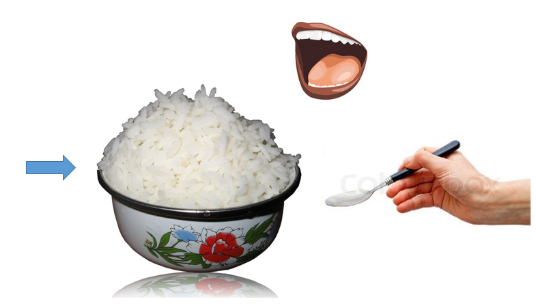


<Researcher> (Chooses between the two pictures)


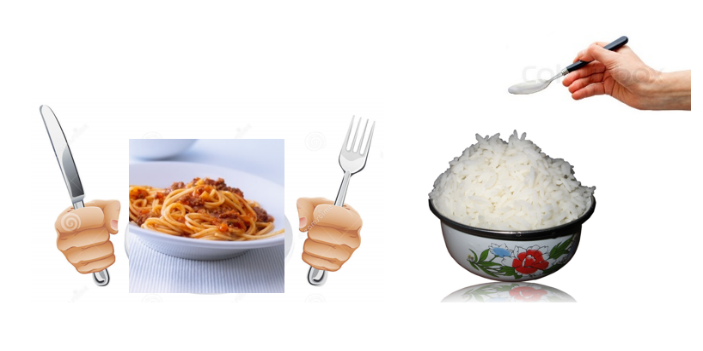


**Appendix C. Example of posttests**

1. Subject –*i/ka* (Test 1)

“A gorilla flies”

**
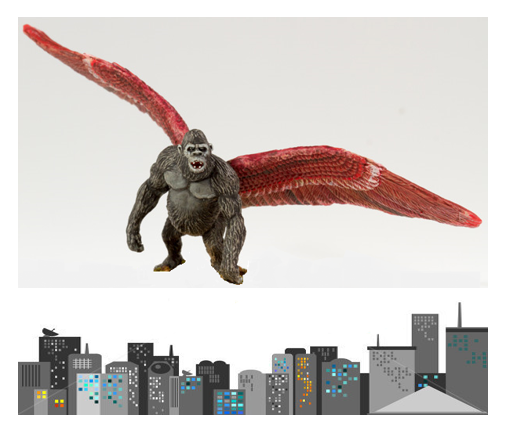
**

2. Object –*ul/lul* (Test 2)

“(Someone) buys gum”


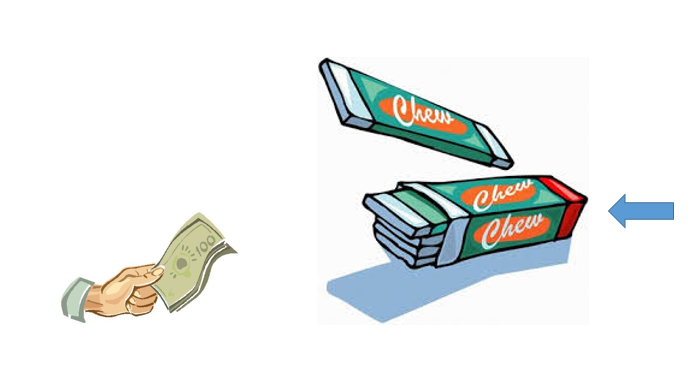

Supplement: Supplementary file 1 [file Appendices.docx]
